# Supplementary material for: Identifying and Managing Areas under Threat in the Iberian Peninsula: An Invasion Risk Atlas for Non-Native Aquatic Plant Species as a Potential Tool
Source: MDPI journal article supplement (doi:10.3390/plants12173069), 2023-08-26
Supplement: s1 [file s1]

**Table S1.** Results from SDMs performed for non-native aquatic plant species that are already established in the Iberian Peninsula. Occurrences = sample size used to run the model at the global scale after cleaning up the original occurrence data. AUC = area under the ROC curve. SD = standard error. MaxTSS = maximum training sensitivity and specificity threshold.

| Species                                                                   | Occurrences | AUC   | SD    | MaxTSS |
|---------------------------------------------------------------------------|-------------|-------|-------|--------|
| <i>Alternanthera philoxeroides</i> (Mart.) Griseb.                        | 2,762       | 0.888 | 0.005 | 0.238  |
| <i>Azolla filiculoides</i> Lam.                                           | 4,827       | 0.831 | 0.006 | 0.306  |
| <i>Bacopa monnieri</i> (L.) Pennell                                       | 1,797       | 0.900 | 0.007 | 0.232  |
| <i>Crassula aquatica</i> (L.) Schönland                                   | 1,022       | 0.933 | 0.008 | 0.221  |
| <i>Egeria densa</i> Planch.                                               | 1,438       | 0.920 | 0.006 | 0.248  |
| <i>Eichhornia crassipes</i> (Mart.) Solms                                 | 2,278       | 0.875 | 0.007 | 0.284  |
| <i>Elodea canadensis</i> Michx.                                           | 15,072      | 0.702 | 0.005 | 0.371  |
| <i>Heteranthera limosa</i> (Sw.) Willd.                                   | 508         | 0.938 | 0.011 | 0.197  |
| <i>Heteranthera reniformis</i> Ruiz & Pav.                                | 667         | 0.938 | 0.008 | 0.243  |
| <i>Heteranthera rotundifolia</i> (Kunth) Griseb.                          | 175         | 0.949 | 0.017 | 0.236  |
| <i>Hydrocotyle bonariensis</i> Lam.                                       | 1,290       | 0.929 | 0.006 | 0.193  |
| <i>Hydrocotyle ranunculoides</i> L. f.                                    | 2,354       | 0.893 | 0.006 | 0.241  |
| <i>Hydrocotyle verticillata</i> Thunb.                                    | 1,088       | 0.918 | 0.008 | 0.237  |
| <i>Lagarosiphon major</i> Moss ex Wager                                   | 1,811       | 0.926 | 0.004 | 0.159  |
| <i>Lemna minuta</i> Kunth                                                 | 4,123       | 0.857 | 0.005 | 0.295  |
| <i>Lemna valdiviana</i> Phil                                              | 177         | 0.933 | 0.020 | 0.194  |
| <i>Limnobium laevigatum</i> (Humb. & Bonpl. ex Willd.) Heine              | 201         | 0.954 | 0.016 | 0.256  |
| <i>Ludwigia grandiflora</i> (Michx.) Greuter & Burdet                     | 1,935       | 0.917 | 0.005 | 0.246  |
| <i>Ludwigia peploides</i> subsp. <i>montevidensis</i> (Spreng.) P.H.Raven | 1,390       | 0.930 | 0.005 | 0.165  |
| <i>Ludwigia repens</i> J.R. Frost.                                        | 260         | 0.952 | 0.017 | 0.142  |
| <i>Myriophyllum aquaticum</i> (vell.) Verdc.                              | 4,605       | 0.839 | 0.005 | 0.273  |
| <i>Myriophyllum heterophyllum</i> Michx.                                  | 694         | 0.954 | 0.006 | 0.202  |
| <i>Najas gracillima</i> (A.Braun ex. Engelm.) Magnus                      | 155         | 0.969 | 0.016 | 0.137  |
| <i>Najas graminea</i> Delile                                              | 243         | 0.948 | 0.021 | 0.196  |
| <i>Nymphaea mexicana</i> Zucc.                                            | 215         | 0.976 | 0.008 | 0.082  |
| <i>Pistia stratiotes</i> L.                                               | 3,127       | 0.846 | 0.007 | 0.291  |
| <i>Rotala indica</i> (Willd.) Koehne                                      | 498         | 0.965 | 0.007 | 0.137  |
| <i>Salvinia natans</i> (L.) All.                                          | 1,825       | 0.910 | 0.006 | 0.256  |
| <i>Salvinia molesta</i> D. S. Mitch.                                      | 867         | 0.931 | 0.008 | 0.209  |
| <i>Spartina alterniflora</i> Loisel.                                      | 307         | 0.981 | 0.003 | 0.112  |
| <i>Spartina densiflora</i> Brongn.                                        | 68          | 0.993 | 0.005 | 0.042  |
| <i>Spartina patens</i> (Aiton) Muhl.                                      | 241         | 0.985 | 0.004 | 0.047  |

**Table S2.** Results from SDMs performed for non-native aquatic plant species that have the potential to invade the Iberian Peninsula. Occurrences = sample size used to run the model at the global scale after cleaning up the original occurrence data. AUC = area under the ROC curve. SD = standard error. MaxTSS = maximum training sensitivity and specificity threshold.

| Species                                                        | Occurrences | AUC   | SD    | MaxTSS |
|----------------------------------------------------------------|-------------|-------|-------|--------|
| <i>Aponogeton distachyos</i> L. f.                             | 569         | 0.968 | 0.005 | 0.126  |
| <i>Azolla microphylla</i> Kaulf.                               | 89          | 0.921 | 0.035 | 0.286  |
| <i>Cabomba caroliniana</i> A. Gray                             | 736         | 0.951 | 0.006 | 0.180  |
| <i>Callitriche deflexa</i> A. Braun ex. Hegelm.                | 22          | 0.978 | 0.028 | 0.086  |
| <i>Crassula helmsii</i> (Kirk) Cockayne                        | 3,235       | 0.883 | 0.005 | 0.248  |
| <i>Eichhornia diversifolia</i> (Vahl) Urb.                     | 129         | 0.943 | 0.015 | 0.287  |
| <i>Elodea callitrichoides</i> (Rich.) Casp.                    | 62          | 0.993 | 0.004 | 0.029  |
| <i>Elodea nuttallii</i> (Planch.) H. St. John                  | 6,212       | 0.814 | 0.005 | 0.375  |
| <i>Gymnocoronis spilanthoides</i> (D. Don ex Hook. & Arn.) DC. | 258         | 0.980 | 0.005 | 0.111  |
| <i>Halophila stipulacea</i> (Forssk.) Asch.                    | 58          | 0.984 | 0.010 | 0.153  |
| <i>Heteranthera zosterifolia</i> Mart.                         | 39          | 0.972 | 0.028 | 0.240  |
| <i>Hydrilla verticillata</i> (L. f.) Royle                     | 2,045       | 0.879 | 0.008 | 0.245  |
| <i>Hydrocotyle moschata</i> G. Forst.                          | 526         | 0.976 | 0.003 | 0.163  |
| <i>Hydrocotyle sibthorpioides</i> Lam.                         | 3,190       | 0.874 | 0.005 | 0.241  |
| <i>Hygrophila polysperma</i> (Roxb.) T. Anderson               | 148         | 0.981 | 0.013 | 0.078  |
| <i>Landoltia punctata</i> (G. Mey) Les & D.J. Crawford         | 585         | 0.951 | 0.008 | 0.131  |
| <i>Lemna aequinoctialis</i> Welw. *                            | 3           | -     | -     | -      |
| <i>Lemna perpusilla</i> Torr                                   | 275         | 0.971 | 0.012 | 0.140  |
| <i>Lemna turionifera</i> Landolt                               | 1,459       | 0.911 | 0.007 | 0.263  |
| <i>Ludwigia alternifolia</i> L.                                | 1,516       | 0.934 | 0.004 | 0.213  |
| <i>Murdannia keisak</i> (Hassk.) Hand. -Mazz.                  | 1,088       | 0.947 | 0.005 | 0.181  |
| <i>Myriophyllum verrucosum</i> Lindl.                          | 874         | 0.945 | 0.005 | 0.226  |
| <i>Najas guadalupensis</i> (Spreng.) Magnus                    | 746         | 0.914 | 0.012 | 0.277  |
| <i>Nelumbo nucifera</i> Gaertn.                                | 1,272       | 0.907 | 0.009 | 0.230  |
| <i>Nuphar advena</i> (Aiton) W.T. Aiton                        | 1,282       | 0.937 | 0.005 | 0.158  |
| <i>Nymphaea lotus</i> L.                                       | 591         | 0.917 | 0.012 | 0.178  |
| <i>Orontium aquaticum</i> L.                                   | 744         | 0.963 | 0.003 | 0.262  |
| <i>Ottelia alismoides</i> (L.) Pers.                           | 333         | 0.944 | 0.014 | 0.155  |
| <i>Pontederia cordata</i> L.                                   | 5,828       | 0.810 | 0.006 | 0.312  |
| <i>Potamogeton epihydrus</i> Raf.                              | 951         | 0.936 | 0.008 | 0.277  |
| <i>Rotala ramosior</i> (L.) Koehne                             | 603         | 0.945 | 0.009 | 0.175  |
| <i>Rotala rotundifolia</i> (Buch. -Ham ex. Roxb.) Koehne       | 286         | 0.966 | 0.012 | 0.135  |
| <i>Sagittaria graminea</i> Michx.                              | 724         | 0.953 | 0.006 | 0.179  |
| <i>Sagittaria platyphylla</i> (Engelm.) J.G. Sm.               | 393         | 0.971 | 0.007 | 0.167  |
| <i>Sagittaria rigida</i> Pursh                                 | 309         | 0.971 | 0.009 | 0.240  |
| <i>Salvinia auriculata</i> Aubl.                               | 351         | 0.948 | 0.011 | 0.250  |
| <i>Salvinia minima</i> Baker                                   | 837         | 0.952 | 0.006 | 0.129  |
| <i>Saururus cernuus</i> L.                                     | 2,983       | 0.887 | 0.005 | 0.235  |
| <i>Spartina anglica</i> C. E. Hubb.                            | 834         | 0.964 | 0.003 | 0.170  |
| <i>Vallisneria nana</i> R. Br                                  | 191         | 0.960 | 0.012 | 0.247  |
| <i>Zostera japonica</i> Asch. & Graebn.                        | 62          | 0.986 | 0.016 | 0.056  |

\* *Lemna aequinoctialis* was excluded from the analyses due to the small number of records.

**Table S3.** List of links to download species occurrence records from the GBIF platform.

| Species                                                       | GBIF Download link                                                                                                                        |
|---------------------------------------------------------------|-------------------------------------------------------------------------------------------------------------------------------------------|
| <i>Alternanthera philoxeroides</i> (Mart.) Griseb.            | GBIF.org (26 January 2023) GBIF Occurrence Download <a href="https://doi.org/10.15468/dl.uq5bmg">https://doi.org/10.15468/dl.uq5bmg</a>   |
| <i>Aponogeton distachyos</i> L. f.                            | GBIF.org (27 January 2023) GBIF Occurrence Download <a href="https://doi.org/10.15468/dl.c586zy">https://doi.org/10.15468/dl.c586zy</a>   |
| <i>Azolla filiculoides</i> Lam.                               | GBIF.org (26 January 2023) GBIF Occurrence Download <a href="https://doi.org/10.15468/dl.6an8nt">https://doi.org/10.15468/dl.6an8nt</a>   |
| <i>Azolla microphylla</i> Kaulf.                              | GBIF.org (27 January 2023) GBIF Occurrence Download <a href="https://doi.org/10.15468/dl.3grwv8">https://doi.org/10.15468/dl.3grwv8</a>   |
| <i>Bacopa monnieri</i> (L.) Pennell                           | GBIF.org (26 January 2023) GBIF Occurrence Download <a href="https://doi.org/10.15468/dl.7zbrbd">https://doi.org/10.15468/dl.7zbrbd</a>   |
| <i>Cabomba caroliniana</i> A. Gray                            | GBIF.org (27 January 2023) GBIF Occurrence Download <a href="https://doi.org/10.15468/dl.f9hzn9">https://doi.org/10.15468/dl.f9hzn9</a>   |
| <i>Callitriche deflexa</i> A. Braun ex. Hegelm.               | GBIF.org (27 January 2023) GBIF Occurrence Download <a href="https://doi.org/10.15468/dl.z4tms3">https://doi.org/10.15468/dl.z4tms3</a>   |
| <i>Crassula aquatica</i> (L.) Schönland                       | GBIF.org (26 January 2023) GBIF Occurrence Download <a href="https://doi.org/10.15468/dl.7n7ykj">https://doi.org/10.15468/dl.7n7ykj</a>   |
| <i>Crassula helmsii</i> (Kirk) Cockayne                       | GBIF.org (27 January 2023) GBIF Occurrence Download <a href="https://doi.org/10.15468/dl.7nmwq6">https://doi.org/10.15468/dl.7nmwq6</a>   |
| <i>Egeria densa</i> Planch.                                   | GBIF.org (26 January 2023) GBIF Occurrence Download <a href="https://doi.org/10.15468/dl.dspmvmz">https://doi.org/10.15468/dl.dspmvmz</a> |
| <i>Eichhornia crassipes</i> (Mart.) Solms                     | GBIF.org (26 January 2023) GBIF Occurrence Download <a href="https://doi.org/10.15468/dl.gny4wh">https://doi.org/10.15468/dl.gny4wh</a>   |
| <i>Eichhornia diversifolia</i> (Vahl) Urb.                    | GBIF.org (27 January 2023) GBIF Occurrence Download <a href="https://doi.org/10.15468/dl.69j9ar">https://doi.org/10.15468/dl.69j9ar</a>   |
| <i>Elodea callitrichoides</i> (Rich.) Casp.                   | GBIF.org (27 January 2023) GBIF Occurrence Download <a href="https://doi.org/10.15468/dl.h2ha2u">https://doi.org/10.15468/dl.h2ha2u</a>   |
| <i>Elodea canadensis</i> Michx.                               | GBIF.org (26 January 2023) GBIF Occurrence Download <a href="https://doi.org/10.15468/dl.j5kmk6">https://doi.org/10.15468/dl.j5kmk6</a>   |
| <i>Elodea nuttallii</i> (Planch.) H. St. John                 | GBIF.org (27 January 2023) GBIF Occurrence Download <a href="https://doi.org/10.15468/dl.mxebnd">https://doi.org/10.15468/dl.mxebnd</a>   |
| <i>Gymnocoronis spilanthoides</i> (D.Don ex Hook. & Arn.) DC. | GBIF.org (27 January 2023) GBIF Occurrence Download <a href="https://doi.org/10.15468/dl.a4p5e9">https://doi.org/10.15468/dl.a4p5e9</a>   |
| <i>Halophila stipulacea</i> (Forssk.) Asch.                   | GBIF.org (27 January 2023) GBIF Occurrence Download <a href="https://doi.org/10.15468/dl.9cufux">https://doi.org/10.15468/dl.9cufux</a>   |
| <i>Heteranthera limosa</i> (Sw.) Willd.                       | GBIF.org (26 January 2023) GBIF Occurrence Download <a href="https://doi.org/10.15468/dl.nv3hrj">https://doi.org/10.15468/dl.nv3hrj</a>   |
| <i>Heteranthera reniformis</i> Ruiz & Pav.                    | GBIF.org (26 January 2023) GBIF Occurrence Download <a href="https://doi.org/10.15468/dl.fnnnvc">https://doi.org/10.15468/dl.fnnnvc</a>   |
| <i>Heteranthera rotundifolia</i> (Kunth) Griseb.              | GBIF.org (26 January 2023) GBIF Occurrence Download <a href="https://doi.org/10.15468/dl.c58762">https://doi.org/10.15468/dl.c58762</a>   |
| <i>Heteranthera zosterifolia</i> Mart.                        | GBIF.org (27 January 2023) GBIF Occurrence Download <a href="https://doi.org/10.15468/dl.q6vger">https://doi.org/10.15468/dl.q6vger</a>   |
| <i>Hydrilla verticillata</i> (L. f.) Royle                    | GBIF.org (27 January 2023) GBIF Occurrence Download <a href="https://doi.org/10.15468/dl.au64dd">https://doi.org/10.15468/dl.au64dd</a>   |
| <i>Hydrocotyle bonariensis</i> Lam.                           | GBIF.org (26 January 2023) GBIF Occurrence Download <a href="https://doi.org/10.15468/dl.uqhbm5">https://doi.org/10.15468/dl.uqhbm5</a>   |
| <i>Hydrocotyle moschata</i> G. Forst.                         | GBIF.org (27 January 2023) GBIF Occurrence Download <a href="https://doi.org/10.15468/dl.chnp36">https://doi.org/10.15468/dl.chnp36</a>   |
| <i>Hydrocotyle ranunculoides</i> L. f.                        | GBIF.org (26 January 2023) GBIF Occurrence                                                                                                |

|                                                                           |                                                                                                                                            |
|---------------------------------------------------------------------------|--------------------------------------------------------------------------------------------------------------------------------------------|
| <i>Hydrocotyle sibthorpioides</i> Lam.                                    | Download <a href="https://doi.org/10.15468/dl.a4p5h5">https://doi.org/10.15468/dl.a4p5h5</a><br>GBIF.org (27 January 2023) GBIF Occurrence |
| <i>Hydrocotyle verticillata</i> Thunb.                                    | Download <a href="https://doi.org/10.15468/dl.m6vwex">https://doi.org/10.15468/dl.m6vwex</a><br>GBIF.org (26 January 2023) GBIF Occurrence |
| <i>Hygrophila polysperma</i> (Roxb.) T. Anderson                          | Download <a href="https://doi.org/10.15468/dl.sff9xz">https://doi.org/10.15468/dl.sff9xz</a><br>GBIF.org (27 January 2023) GBIF Occurrence |
| <i>Lagarosiphon major</i> Moss ex Wager                                   | Download <a href="https://doi.org/10.15468/dl.4eq9np">https://doi.org/10.15468/dl.4eq9np</a><br>GBIF.org (27 January 2023) GBIF Occurrence |
| <i>Landoltia punctata</i> (G. Mey) Les & D.J. Crawford                    | Download <a href="https://doi.org/10.15468/dl.u65z9u">https://doi.org/10.15468/dl.u65z9u</a><br>GBIF.org (27 January 2023) GBIF Occurrence |
| <i>Lemna aequinoctialis</i> Welw.                                         | Download <a href="https://doi.org/10.15468/dl.yzz7zu">https://doi.org/10.15468/dl.yzz7zu</a><br>GBIF.org (27 January 2023) GBIF Occurrence |
| <i>Lemna minuta</i> Kunth                                                 | Download <a href="https://doi.org/10.15468/dl.xrhsu6">https://doi.org/10.15468/dl.xrhsu6</a><br>GBIF.org (27 January 2023) GBIF Occurrence |
| <i>Lemna perpusilla</i> Torr.                                             | Download <a href="https://doi.org/10.15468/dl.rkph69">https://doi.org/10.15468/dl.rkph69</a><br>GBIF.org (27 January 2023) GBIF Occurrence |
| <i>Lemna turionifera</i> Landolt                                          | Download <a href="https://doi.org/10.15468/dl.586r66">https://doi.org/10.15468/dl.586r66</a><br>GBIF.org (27 January 2023) GBIF Occurrence |
| <i>Lemna valdiviana</i> Phil.                                             | Download <a href="https://doi.org/10.15468/dl.75jzg4">https://doi.org/10.15468/dl.75jzg4</a><br>GBIF.org (27 January 2023) GBIF Occurrence |
| <i>Limnobium laevigatum</i> (Humb. & Bonpl. ex Willd.) Heine              | Download <a href="https://doi.org/10.15468/dl.x6vevm">https://doi.org/10.15468/dl.x6vevm</a><br>GBIF.org (27 January 2023) GBIF Occurrence |
| <i>Ludwigia alternifolia</i> L.                                           | Download <a href="https://doi.org/10.15468/dl.atypv7">https://doi.org/10.15468/dl.atypv7</a><br>GBIF.org (27 January 2023) GBIF Occurrence |
| <i>Ludwigia grandiflora</i> (Michx.) Greuter & Burdet                     | Download <a href="https://doi.org/10.15468/dl.7qb4pq">https://doi.org/10.15468/dl.7qb4pq</a><br>GBIF.org (27 January 2023) GBIF Occurrence |
| <i>Ludwigia peploides</i> subsp. <i>montevidensis</i> (Spreng.) P.H.Raven | Download <a href="https://doi.org/10.15468/dl.6x28x9">https://doi.org/10.15468/dl.6x28x9</a><br>GBIF.org (27 January 2023) GBIF Occurrence |
| <i>Ludwigia repens</i> J.R. Frost.                                        | Download <a href="https://doi.org/10.15468/dl.ufhjz7">https://doi.org/10.15468/dl.ufhjz7</a><br>GBIF.org (27 January 2023) GBIF Occurrence |
| <i>Murdannia keisak</i> (Hassk.) Hand.-Mazz.                              | Download <a href="https://doi.org/10.15468/dl.t47ytc">https://doi.org/10.15468/dl.t47ytc</a><br>GBIF.org (27 January 2023) GBIF Occurrence |
| <i>Myriophyllum aquaticum</i> (Vell.) Verdc.                              | Download <a href="https://doi.org/10.15468/dl.h5uz6h">https://doi.org/10.15468/dl.h5uz6h</a><br>GBIF.org (27 January 2023) GBIF Occurrence |
| <i>Myriophyllum heterophyllum</i> Michx.                                  | Download <a href="https://doi.org/10.15468/dl.k7bxvj">https://doi.org/10.15468/dl.k7bxvj</a><br>GBIF.org (27 January 2023) GBIF Occurrence |
| <i>Myriophyllum verrucosum</i> Lindl.                                     | Download <a href="https://doi.org/10.15468/dl.sjmt6x">https://doi.org/10.15468/dl.sjmt6x</a><br>GBIF.org (27 January 2023) GBIF Occurrence |
| <i>Najas gracillima</i> (A.Braun ex. Engelm.) Magnus                      | Download <a href="https://doi.org/10.15468/dl.kye8jt">https://doi.org/10.15468/dl.kye8jt</a><br>GBIF.org (27 January 2023) GBIF Occurrence |
| <i>Najas graminea</i> Delile                                              | Download <a href="https://doi.org/10.15468/dl.tcr2pk">https://doi.org/10.15468/dl.tcr2pk</a><br>GBIF.org (27 January 2023) GBIF Occurrence |
| <i>Najas guadalupensis</i> (Spreng.) Magnus                               | Download <a href="https://doi.org/10.15468/dl.kz9ftm">https://doi.org/10.15468/dl.kz9ftm</a><br>GBIF.org (27 January 2023) GBIF Occurrence |
| <i>Nelumbo nucifera</i> Gaertn.                                           | Download <a href="https://doi.org/10.15468/dl.wbehhj">https://doi.org/10.15468/dl.wbehhj</a><br>GBIF.org (27 January 2023) GBIF Occurrence |
| <i>Nuphar advena</i> (Aiton) W.T. Aiton                                   | Download <a href="https://doi.org/10.15468/dl.dznqxm">https://doi.org/10.15468/dl.dznqxm</a><br>GBIF.org (27 January 2023) GBIF Occurrence |
| <i>Nymphaea lotus</i> L.                                                  | Download <a href="https://doi.org/10.15468/dl.dfhmkg">https://doi.org/10.15468/dl.dfhmkg</a><br>GBIF.org (27 January 2023) GBIF Occurrence |
| <i>Nymphaea mexicana</i> Zucc.                                            | Download <a href="https://doi.org/10.15468/dl.brk6hg">https://doi.org/10.15468/dl.brk6hg</a><br>GBIF.org (27 January 2023) GBIF Occurrence |
|                                                                           | Download <a href="https://doi.org/10.15468/dl.w4q8eb">https://doi.org/10.15468/dl.w4q8eb</a>                                               |

|                                                         |                                                                                                                                         |
|---------------------------------------------------------|-----------------------------------------------------------------------------------------------------------------------------------------|
| <i>Orontium aquaticum</i> L.                            | GBIF.org (27 January 2023) GBIF Occurrence Download <a href="https://doi.org/10.15468/dl.kryx5b">https://doi.org/10.15468/dl.kryx5b</a> |
| <i>Ottelia alismoides</i> (L.) Pers.                    | GBIF.org (27 January 2023) GBIF Occurrence Download <a href="https://doi.org/10.15468/dl.ayzr5u">https://doi.org/10.15468/dl.ayzr5u</a> |
| <i>Pistia stratiotes</i> L.                             | GBIF.org (27 January 2023) GBIF Occurrence Download <a href="https://doi.org/10.15468/dl.ux9wcp">https://doi.org/10.15468/dl.ux9wcp</a> |
| <i>Pontederia cordata</i> L.                            | GBIF.org (27 January 2023) GBIF Occurrence Download <a href="https://doi.org/10.15468/dl.9nt6ap">https://doi.org/10.15468/dl.9nt6ap</a> |
| <i>Potamogeton epihydrus</i> Raf.                       | GBIF.org (27 January 2023) GBIF Occurrence Download <a href="https://doi.org/10.15468/dl.t7d94c">https://doi.org/10.15468/dl.t7d94c</a> |
| <i>Rotala indica</i> (Willd.) Koehne                    | GBIF.org (27 January 2023) GBIF Occurrence Download <a href="https://doi.org/10.15468/dl.n5rc75">https://doi.org/10.15468/dl.n5rc75</a> |
| <i>Rotala ramosior</i> (L.) Koehne                      | GBIF.org (27 January 2023) GBIF Occurrence Download <a href="https://doi.org/10.15468/dl.9b9bpm">https://doi.org/10.15468/dl.9b9bpm</a> |
| <i>Rotala rotundifolia</i> (Buch.-Ham. ex Roxb.) Koehne | GBIF.org (27 January 2023) GBIF Occurrence Download <a href="https://doi.org/10.15468/dl.wqtv48">https://doi.org/10.15468/dl.wqtv48</a> |
| <i>Sagittaria graminea</i> Michx.                       | GBIF.org (27 January 2023) GBIF Occurrence Download <a href="https://doi.org/10.15468/dl.s5g8fs">https://doi.org/10.15468/dl.s5g8fs</a> |
| <i>Sagittaria platyphylla</i> (Engelm.) J.G. Sm.        | GBIF.org (27 January 2023) GBIF Occurrence Download <a href="https://doi.org/10.15468/dl.ysfhmd">https://doi.org/10.15468/dl.ysfhmd</a> |
| <i>Sagittaria rigida</i> Pursh                          | GBIF.org (27 January 2023) GBIF Occurrence Download <a href="https://doi.org/10.15468/dl.5cz6ac">https://doi.org/10.15468/dl.5cz6ac</a> |
| <i>Salvinia auriculata</i> Aubl.                        | GBIF.org (27 January 2023) GBIF Occurrence Download <a href="https://doi.org/10.15468/dl.pkufxf">https://doi.org/10.15468/dl.pkufxf</a> |
| <i>Salvinia minima</i> Baker                            | GBIF.org (27 January 2023) GBIF Occurrence Download <a href="https://doi.org/10.15468/dl.7sh6jt">https://doi.org/10.15468/dl.7sh6jt</a> |
| <i>Salvinia natans</i> (L.) All.                        | GBIF.org (27 January 2023) GBIF Occurrence Download <a href="https://doi.org/10.15468/dl.p59ymw">https://doi.org/10.15468/dl.p59ymw</a> |
| <i>Salvinia molesta</i> D. S. Mitch.                    | GBIF.org (27 January 2023) GBIF Occurrence Download <a href="https://doi.org/10.15468/dl.pjnasy">https://doi.org/10.15468/dl.pjnasy</a> |
| <i>Saururus cernuus</i> L.                              | GBIF.org (27 January 2023) GBIF Occurrence Download <a href="https://doi.org/10.15468/dl.makkbd">https://doi.org/10.15468/dl.makkbd</a> |
| <i>Spartina alterniflora</i> Loisel.                    | GBIF.org (27 January 2023) GBIF Occurrence Download <a href="https://doi.org/10.15468/dl.jjtacg">https://doi.org/10.15468/dl.jjtacg</a> |
| <i>Spartina anglica</i> C. E. Hubb.                     | GBIF.org (27 January 2023) GBIF Occurrence Download <a href="https://doi.org/10.15468/dl.5k2z5n">https://doi.org/10.15468/dl.5k2z5n</a> |
| <i>Spartina densiflora</i> Brongn.                      | GBIF.org (27 January 2023) GBIF Occurrence Download <a href="https://doi.org/10.15468/dl.873sxh">https://doi.org/10.15468/dl.873sxh</a> |
| <i>Spartina patens</i> (Aiton) Muhl.                    | GBIF.org (27 January 2023) GBIF Occurrence Download <a href="https://doi.org/10.15468/dl.krdfy3">https://doi.org/10.15468/dl.krdfy3</a> |
| <i>Vallisneria nana</i> R. Br.                          | GBIF.org (27 January 2023) GBIF Occurrence Download <a href="https://doi.org/10.15468/dl.c9efjq">https://doi.org/10.15468/dl.c9efjq</a> |
| <i>Zostera japonica</i> Asch. & Graebn.                 | GBIF.org (27 January 2023) GBIF Occurrence Download <a href="https://doi.org/10.15468/dl.bybefz">https://doi.org/10.15468/dl.bybefz</a> |

---
